# Supplementary material for: Enhanced Photocatalytic and Filtration Performance of TiO2-Ag Composite-Coated Membrane Used for the Separation of Oil Emulsions
Source: MDPI journal article supplement (doi:10.3390/separations11040112), 2024-04-05
Supplement: s1 [file s1]

## Supplementary material for

# Enhanced Photocatalytic and Filtration Performance of TiO<sub>2</sub>-Ag Composite-Coated Membrane Used for the Separation of Oil Emulsions

Ákos Ferenc Fazekas <sup>1,2</sup>, Tamás Gyulavári <sup>3</sup>, Áron Ágoston <sup>4</sup>, László Janovák <sup>4</sup>, Judit Kopniczky <sup>5</sup>, Zsuzsanna László <sup>1,\*</sup> and Gábor Veréb <sup>1,\*</sup>

<sup>1</sup> Department of Biosystem Engineering, Faculty of Engineering, University of Szeged, Moszkvai Blvd. 9., H-6725 Szeged, Hungary

<sup>2</sup> Doctoral School of Environmental Sciences, University of Szeged, Rerrich Béla Sq. 1, H-6720 Szeged, Hungary

<sup>3</sup> Department of Applied and Environmental Chemistry, Institute of Chemistry, University of Szeged, Rerrich Béla Sq. 1, H-6720 Szeged, Hungary

<sup>4</sup> Department of Physical Chemistry and Materials Sciences, University of Szeged, Rerrich Béla Sq. 1, H-6720 Szeged, Hungary

<sup>5</sup> Department of Optics and Quantum Electronics, Institute of Physics, University of Szeged, Dóm Sqr. 9, H-6720 Szeged, Hungary

\*Correspondence: [verebg@mk.u-szeged.hu](mailto:verebg@mk.u-szeged.hu), [zsizsu@mk.u-szeged.hu](mailto:zsizsu@mk.u-szeged.hu)

Figure S1

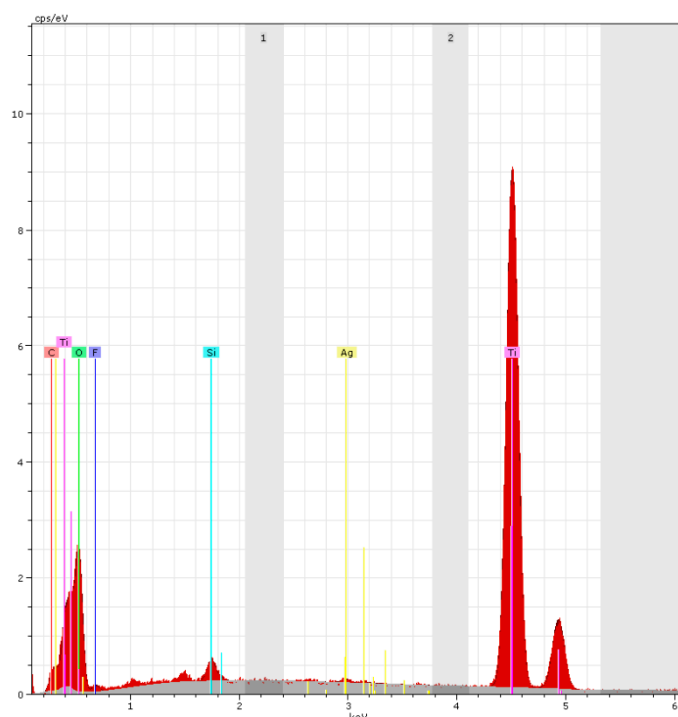

Figure S1. Elemental analysis of the TiO<sub>2</sub>-Ag-coated PVDF membrane
